# Supplementary material
Source: MDPI journal article supplement (https://www.mdpi.com/2077-0472/12/10/1667)

## Supplementary Material

# Toxicity, Histopathological Alterations and Acetylcholinesterase Inhibition of *Illicium verum* Essential Oil in *Drosophila suzukii*

Luciano de Souza <sup>1,2</sup>, Maria das Graças Cardoso <sup>1</sup>, Isaac Filipe Moreira Konig <sup>1,3</sup>,  
Vanúzia Rodrigues Fernandes Ferreira <sup>1</sup>, Alex Rodrigues Silva Caetano <sup>1</sup>,  
Gabriela Aguiar Campolina <sup>4</sup> and Khalid Haddi <sup>2,\*</sup>

<sup>1</sup> Departamento de Química, Universidade Federal de Lavras (UFLA),  
Lavras 37200-000, MG, Brazil

<sup>2</sup> Departamento de Entomologia, Universidade Federal de Lavras (UFLA),  
Lavras 37200-000, MG, Brazil

<sup>3</sup> Departamento de Medicina Veterinária, Universidade Federal de Lavras (UFLA),  
Lavras 37200-000, MG, Brazil

<sup>4</sup> Departamento de Ciência dos Alimentos, Universidade Federal de Lavras (UFLA),  
Lavras 37200-000, MG, Brazil

\* Correspondence: khalid.haddi@ufla.br; Tel.: +55-35-3829-5285

**Supplementary Figure S1:** Chromatograms obtained by chemical characterization of essential oils of *Illicium verum*, *Myristica fragrans* and *Schinus molle*.

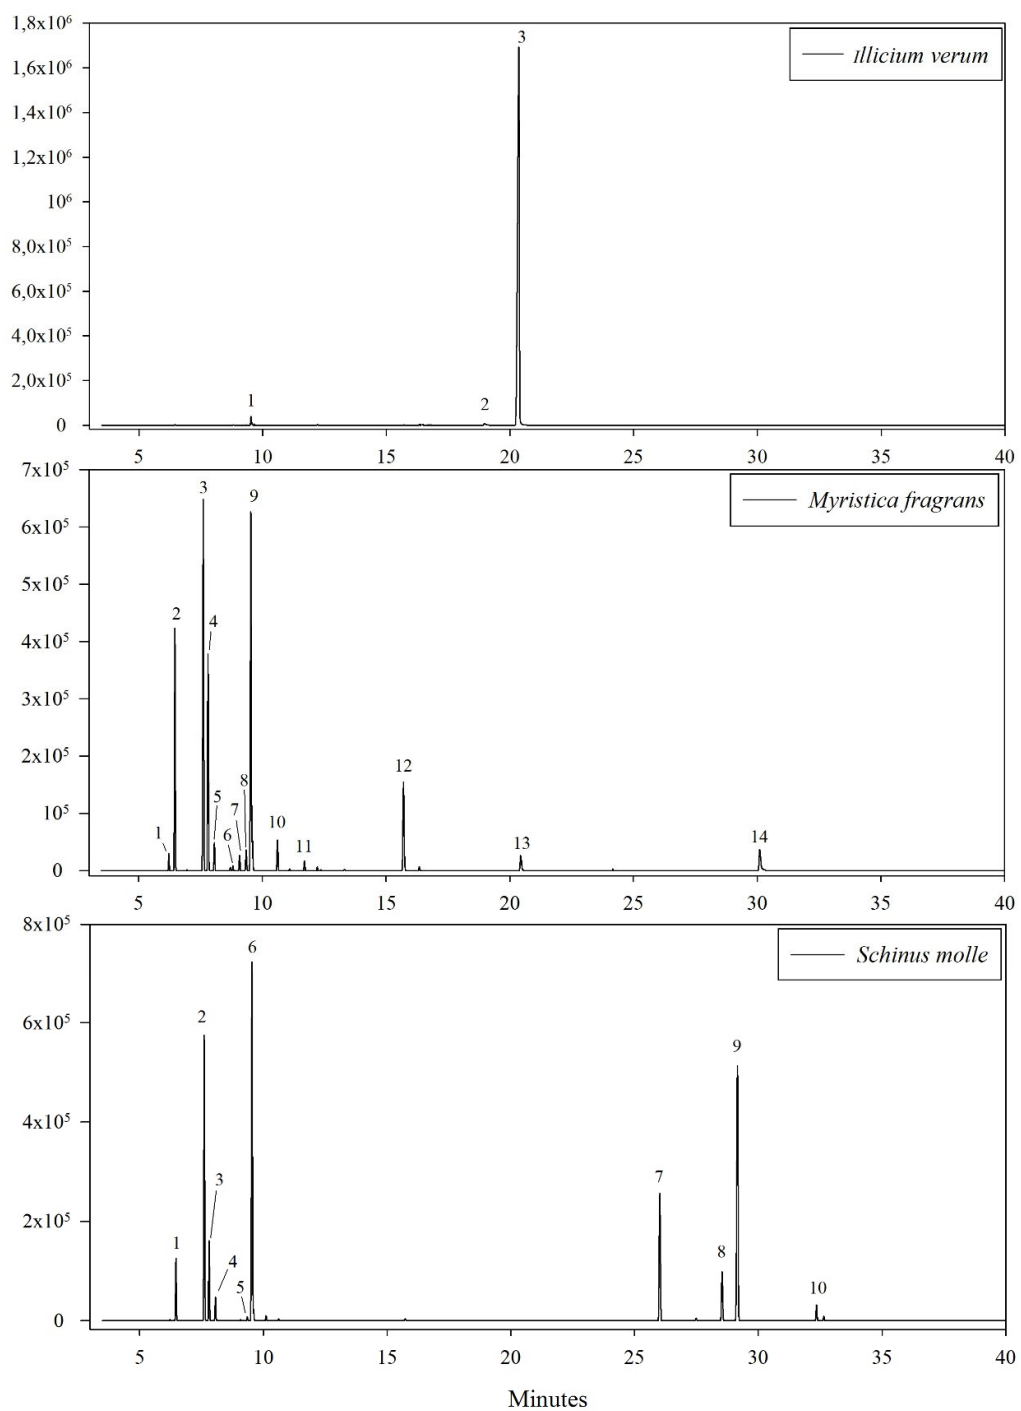

**Supplementary Figure S2:** Acetylcholinesterase inhibition by essential oils of *Illicium verum*, *Myristica fragrans*, *Schinus molle* and carvacrol.

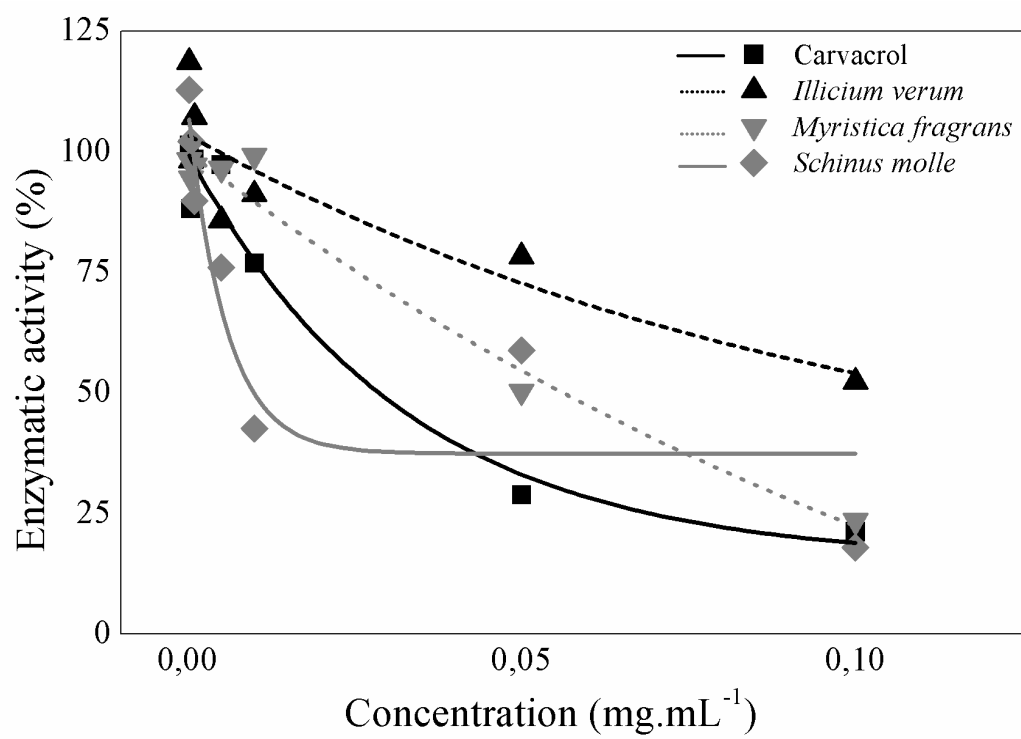

Supplement: s1 [file s1]
